# Supplementary material for: A comparative study of curated contents by knowledge-based curation system in cancer clinical sequencing
Source: PubMed Central journal article supplement (PMC6683116; doi:10.1038/s41598-019-47673-9), 2019-08-05
Supplement: 41598_2019_47673_MOESM1_ESM.pdf [file 41598_2019_47673_MOESM1_ESM.pdf]

## **Supplementary information**

### **A comparative study of curated contents by knowledge-based curation system in cancer clinical sequencing**

Kazuko Sakai<sup>1</sup>, Masayuki Takeda<sup>2</sup>, Shigeki Shimizu<sup>3</sup>, Takayuki Takahama<sup>2</sup>, Takeshi Yoshida<sup>2</sup>, Satomi Watanabe<sup>2</sup>, Tsutomu Iwasa<sup>2</sup>, Kimio Yonesaka<sup>2</sup>, Shinichiro Suzuki<sup>2</sup>, Hidetoshi Hayashi<sup>2</sup>, Hisato Kawakami<sup>2</sup>, Yoshikane Nonagase<sup>2</sup>, Kaoru Tanaka<sup>2</sup>, Junji Tsurutani<sup>2</sup>, Kazumasa Saigoh<sup>4</sup>, Akihiko Ito<sup>3</sup>, Tetsuya Mitsudomi<sup>5</sup>, Kazuhiko Nakagawa<sup>2</sup> and Kazuto Nishio<sup>1</sup>

<sup>1</sup>Department of Genome Biology, <sup>2</sup>Department of Medical Oncology, <sup>3</sup>Department of Pathology, <sup>4</sup>Department of Clinical Genetics, <sup>5</sup>Department of Thoracic Surgery, Kindai University Faculty of Medicine, Osaka-Sayama, Osaka 589-8511, Japan.

Correspondence and requests for materials should be addressed to K.N. (email:

[knishio@med.kindai.ac.jp](mailto:knishio@med.kindai.ac.jp))

Supplementary Table 1. Annotation information on the detected 72 variants in 25 cases.

| ID  | Variants                   | WfG | OKR | QCII |
|-----|----------------------------|-----|-----|------|
| S21 | EGFR:p.Glu746_Ala750del    | I   | I   | I    |
| S25 | EGFR:p.Glu746_Ala750del    | I   | I   | I    |
| S02 | EML4-ALK fusion            | I   | I   | I    |
| S28 | EML4-ALK fusion            | I   | I   | I    |
| S20 | EGFR CNG                   | I   | III | I    |
| S04 | PIK3CA:p.His1047Arg        | I   | III | III  |
| S20 | MET CNG                    | III | I   | I    |
| S18 | ERBB2:p.Ser310Phe          | III | II  | I    |
| S01 | KRAS:p.Gly12Val            | III | III | I    |
| S26 | KRAS:p.Gly12Cys            | III | III | I    |
| S30 | TSC1:p.Ser163*             | III | III | III  |
| S02 | ALK:p.Gly1202Arg           | I   |     | I    |
| S14 | PIK3CA:p.His1047Arg        | I   | III |      |
| S04 | MYC CNG                    | III |     | I    |
| S20 | KIT CNG                    | II  | III |      |
| S29 | PIK3CA CNG                 | II  | III |      |
| S31 | PIK3CA:p.Pro449_Leu452del  | II  |     | III  |
| S05 | PIK3R1:p.Tyr431*           | III | III |      |
| S05 | NF2:p.Thr59fs              | III | III |      |
| S08 | NF1:p.Leu1253fs            | III | III |      |
| S11 | KRAS:p.Gly12Val            | III | III |      |
| S14 | FGFR2:p.Lys659Asn          | III | III |      |
| S14 | AKT3 CNG                   | III | III |      |
| S18 | FGFR2:p.Cys382Arg          | III | III |      |
| S27 | TP53:p.Glu285Lys           | III | III |      |
| S20 | CDK6 CNG                   | III |     | III  |
| S01 | TP53:p.Glu204*             | III |     |      |
| S03 | TP53:p.Cys242Tyr           | III |     |      |
| S03 | CCND1 CNG                  | III |     |      |
| S04 | CCNE1 CNG                  | III |     |      |
| S05 | ATM:p.Gln1017*             | III |     |      |
| S07 | TP53:p.Val172_Glu180del    | III |     |      |
| S08 | TP53:p.Arg65*              | III |     |      |
| S09 | TP53:p.Phe270Leu           | III |     |      |
| S09 | CCNE1 CNG                  | III |     |      |
| S10 | TP53:p.Met237Ile           | III |     |      |
| S18 | CREBBP:p.Arg768*           | III |     |      |
| S20 | TP53:p.Glu294*             | III |     |      |
| S21 | TP53:p.Arg175Gly           | III |     |      |
| S24 | TP53:p.Arg110Pro           | III |     |      |
| S25 | TP53:p.Asp148fs            | III |     |      |
| S29 | TP53:p.Ser127Phe           | III |     |      |
| S10 | FANCI:p.Gln1109*           |     | III |      |
| S10 | FANCI:p.Gln1217*           |     | III |      |
| S13 | ERBB3:p.Met60Arg           |     | III |      |
| S28 | SETD2:p.Gln1343*           |     | III |      |
| S29 | SLX4:p.Ser1228fs           |     | III |      |
| S07 | CDK6:p.Phe164fs            |     |     | III  |
| S09 | BRCA2:p.Arg1160Thr         |     |     | III  |
| S16 | PDGFRA:p.Asp784Gly         |     |     | III  |
| S20 | ESR1 CNG                   |     |     | III  |
| S04 | SLX4:p.Ala952Met           |     |     |      |
| S05 | ARID1A:p.Met737Val         |     |     |      |
| S05 | NF1:p.Val2050Phe           |     |     |      |
| S08 | SMARCA4:p.Leu857_Tyr860del |     |     |      |
| S09 | CREBBP:p.Gln2300His        |     |     |      |
| S10 | NF1:p.Arg1132His           |     |     |      |
| S10 | STK11:p.Arg106Trp          |     |     |      |
| S11 | FLT3:Val512Leu             |     |     |      |
| S11 | TSC2:Arg1174Gln            |     |     |      |
| S13 | ARID1A:p.Pro2114Ser        |     |     |      |
| S14 | MLH1:p.Glu430Lys           |     |     |      |
| S19 | PPARG:p.Arg403His          |     |     |      |
| S20 | SMARCA4:p.Glu1252*         |     |     |      |
| S24 | FBXW7:p.Asn633Ser          |     |     |      |
| S24 | FANCA:p.Tyr579Cys          |     |     |      |
| S25 | STK11:p.Ile46Met           |     |     |      |
| S25 | MDM4 CNG                   |     |     |      |
| S27 | FANCD2:p.Ser996Gly         |     |     |      |
| S29 | ATM:p.Leu75Met             |     |     |      |
| S30 | NOTCH2:p.Gly292*           |     |     |      |
| S31 | CHEK1:p.Asp434His          |     |     |      |

■ Evidence level I  
■ Evidence level II  
■ Evidence level III  
■ No therapeutic information

I, approved for the said cancer type; II, approved for other cancer type; III, information of clinical trials

**Supplementary Table 2. Data format for input.**

| Types of gene alteration | Panel          |              |             |
|--------------------------|----------------|--------------|-------------|
|                          | WfG            | QCII         | OKR         |
| Mutation/Indel           | .vcf format    | .vcf format  | .vcf format |
| Fusion                   | .fusion format | direct input | .vcf format |
| Copy number variation    | .log2 format   | direct input | .vcf format |

**Supplementary Table 3. Information of output.**

| Variant Effect Predictor |                                                        | Evidence level<br>for therapeutic<br>information | Evidence level<br>for this report |
|--------------------------|--------------------------------------------------------|--------------------------------------------------|-----------------------------------|
| WfG                      | Actionable                                             | Level 1-4, R1-2                                  |                                   |
| QCII                     | Pathogenic/likely<br>pathogenic/Uncertain significance | Level 1A - 3                                     | Level I, II, III*                 |
| OKR                      | -                                                      | Level IA - IIC                                   |                                   |

\*I, approved for the said cancer type; II, approved for other cancer type; III, information of clinical trials.
